# Supplementary material for: A computational insight on the aromatic amino acids conjugation with [Cp*Rh(H2O)3]2+ by using the meta-dynamics/FMO3 approach
Source: Springer Nature journal article supplement (doi:10.1007/s00894-023-05794-z), 2023-12-12
Supplement: 894_2023_5794_MOESM1_ESM.pdf [file 894_2023_5794_MOESM1_ESM.pdf]

## *Supporting Information*

### **A computational insight on the aromatic amino acids conjugation with $[\text{Cp}^*\text{Rh}(\text{H}_2\text{O})_3]^{2+}$ by using the Meta-dynamics/FMO3 approach.**

Roberto Paciotti<sup>1\*</sup>, Alessandro Marrone<sup>1</sup>

<sup>1</sup> Department of Pharmacy, Università “G. D’Annunzio” Di Chieti-Pescara, Chieti, I-66100, Italy.

\*corresponding to: [r.paciotti@unich.it](mailto:r.paciotti@unich.it)

#### **Table of Contents**

|                |   |
|----------------|---|
| Fig. S1 .....  | 2 |
| Table S1 ..... | 2 |
| Table S2 ..... | 3 |
| Fig. S2 .....  | 3 |
| Fig. S3 .....  | 4 |
| Fig. S4 .....  | 5 |
| Table S3 ..... | 5 |
| Fig. S5 .....  | 6 |
| Fig. S6 .....  | 7 |

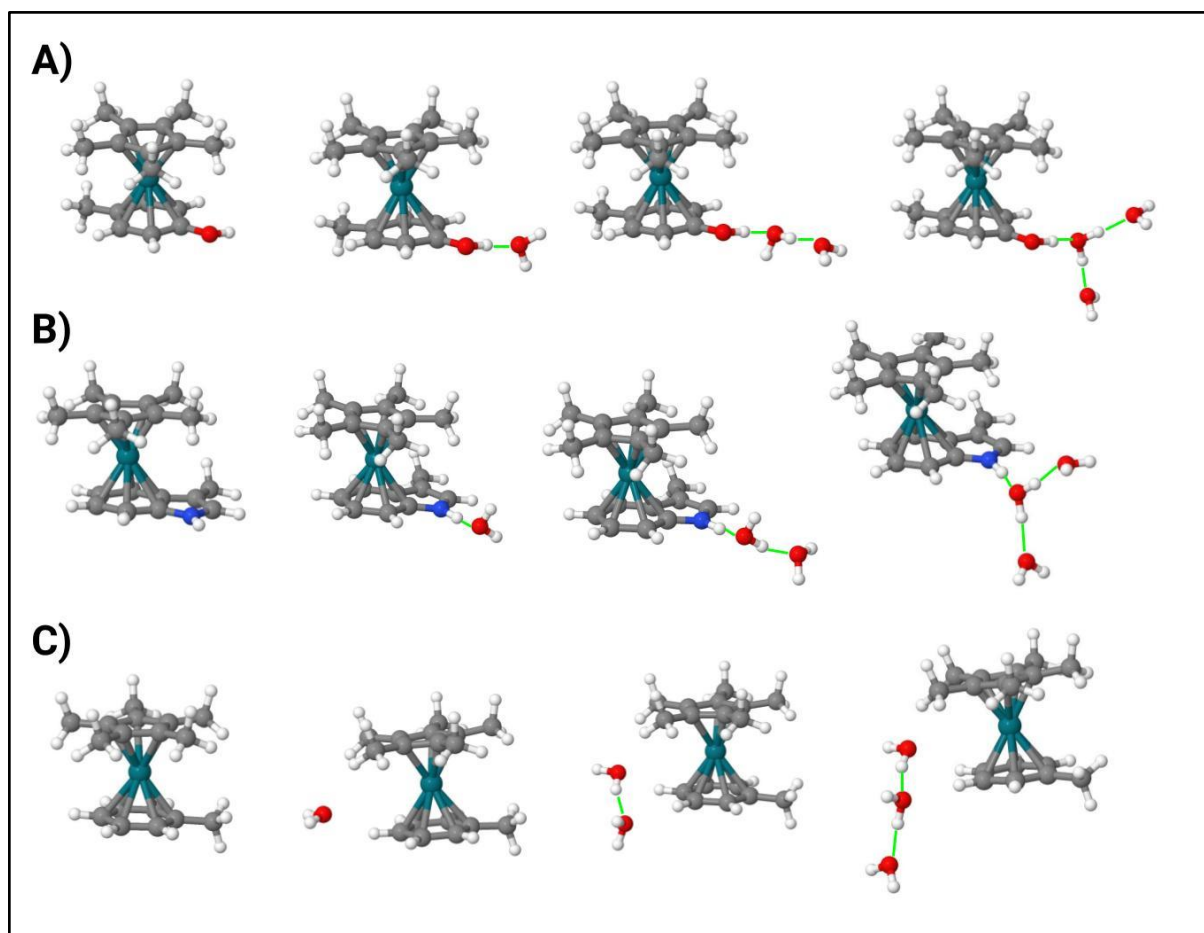

**Fig. S1** Lowest energy structures computed at B3LYP// $\omega$ B97X-D/6-311+G(d,p) of A)  $[\text{Cp}^*\text{Rh}(\text{pC})]^{2+}$ , B)  $[\text{Cp}^*\text{Rh}(3\text{MI})]^{2+}$  and C)  $[\text{Cp}^*\text{Rh}(\text{T})]^{2+}$  along with the corresponding PAs with one, two and three explicit solvation waters. Hydrogen bonds are presented by green lines

**Table S1** X-- $[\text{Cp}^*\text{Rh}]^{2+}$  PIE values by varying the number of explicit waters (from zero to three) including X,  $[\text{Cp}^*\text{Rh}]^{2+}$ , and water molecules in separated fragments and including X and water directly interacting via H bond in the same fragment. All energy values are in kcal/mol

| number of explicit<br>water molecules | X-- $[\text{Cp}^*\text{Rh}]^{2+}$ PIE |            |          |                                                  |            |  |
|---------------------------------------|---------------------------------------|------------|----------|--------------------------------------------------|------------|--|
|                                       | <i>5 fragments</i>                    |            |          | <i>X and H<sub>2</sub>O in the same fragment</i> |            |  |
|                                       | <i>pC</i>                             | <i>3MI</i> | <i>T</i> | <i>pC</i>                                        | <i>3MI</i> |  |
| 0                                     | -114.6                                | -121.8     | -121.7   | -114.6                                           | -121.8     |  |
| 1                                     | -118.6                                | -124.0     | -124.5   | -120.9                                           | -124.6     |  |
| 2                                     | -121.0                                | -125.7     | -125.1   | -123.5                                           | -127.0     |  |
| 3                                     | -125.6                                | -128.3     | -126.6   | -130.6                                           | -129.3     |  |

**Table S2** Average  $X-[\text{Cp}^*\text{Rh}]^{2+}$  PIE values with the corresponding EDAs computed considering stable  $\eta^6$ -PAs obtained in run 1 and 2. Energy and CT values are reported in kcal/mol and elementary charge units, respectively

| Complex |         | PIE    | $E^{\text{es}}$ | $E^{\text{ex}}$ | $E^{\text{ct}}$ | $E^{\text{disp}}$ | $E^{\text{sol}}$ | CT     |
|---------|---------|--------|-----------------|-----------------|-----------------|-------------------|------------------|--------|
| PA1     | average | -122.0 | -196.4          | 245.1           | -130.9          | -55.0             | 15.2             | -0.445 |
|         | std     | 1.6    | 4.3             | 7.0             | 5.0             | 0.7               | 2.2              | 0.012  |
| PA2     | average | -130.4 | -209.4          | 241.4           | -127.7          | -56.5             | 21.9             | -0.400 |
|         | std     | 11.8   | 16.5            | 29.5            | 18.7            | 5.9               | 1.2              | 0.079  |
| PA3     | average | -128.8 | -198.2          | 240.6           | -128.3          | -56.2             | 13.4             | -0.420 |
|         | std     | 1.1    | 3.1             | 6.3             | 3.9             | 0.6               | 1.0              | 0.007  |

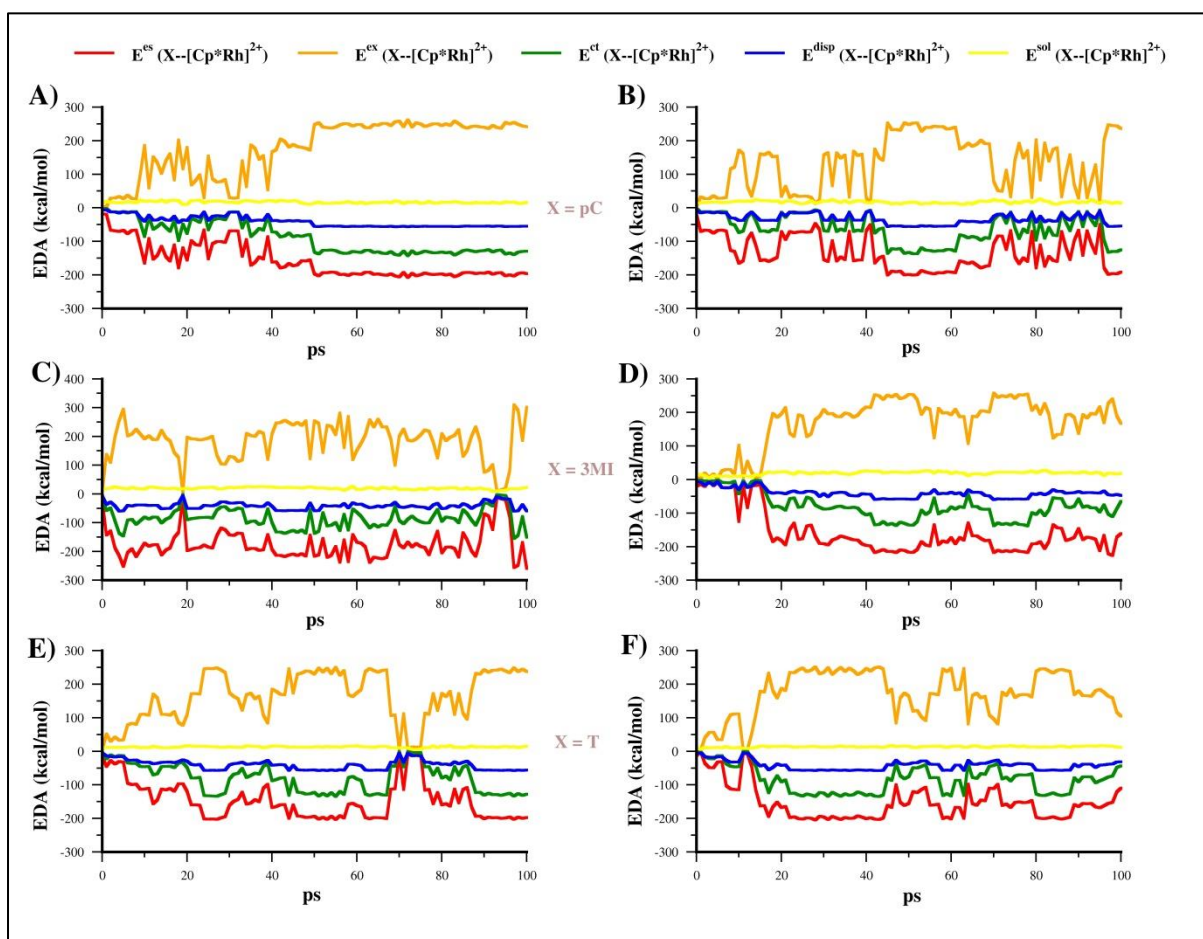

**Fig. S2** EDA of  $X-[\text{Cp}^*\text{Rh}]^{2+}$  PIEs computed for sampled structures of MTD(RMSD) run 1 and 2 for EC1 (a and b), EC2 (c and d) and EC3 (e and f)

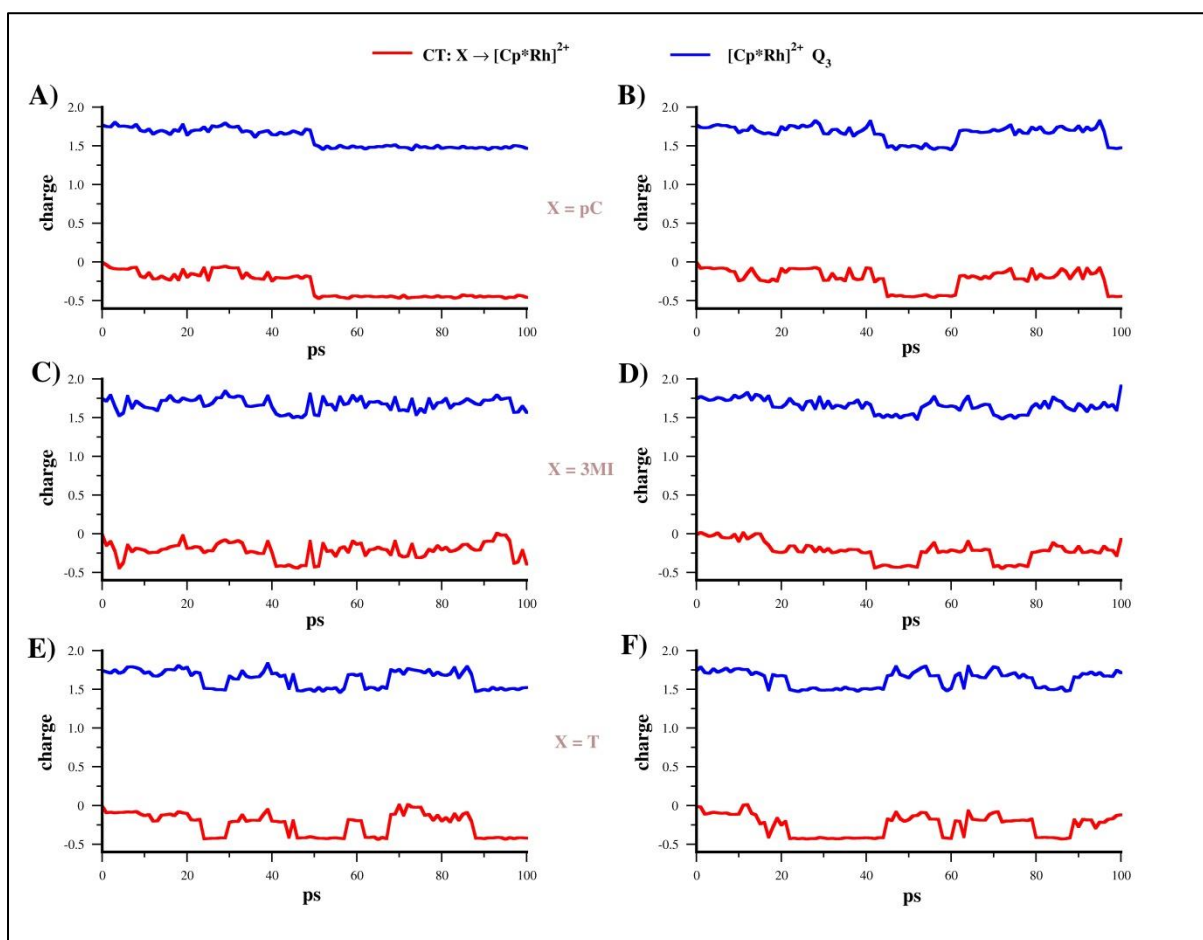

**Fig. S3** CT from X to [Cp\*Rh]<sup>2+</sup> (red line) and Q<sub>3</sub> of [Cp\*Rh]<sup>2+</sup> (blue line) computed for sampled structures of MTD(RMSD) run 1 and 2 for **EC1** (a and b), **EC2** (c and d) and **EC3** (e and f)

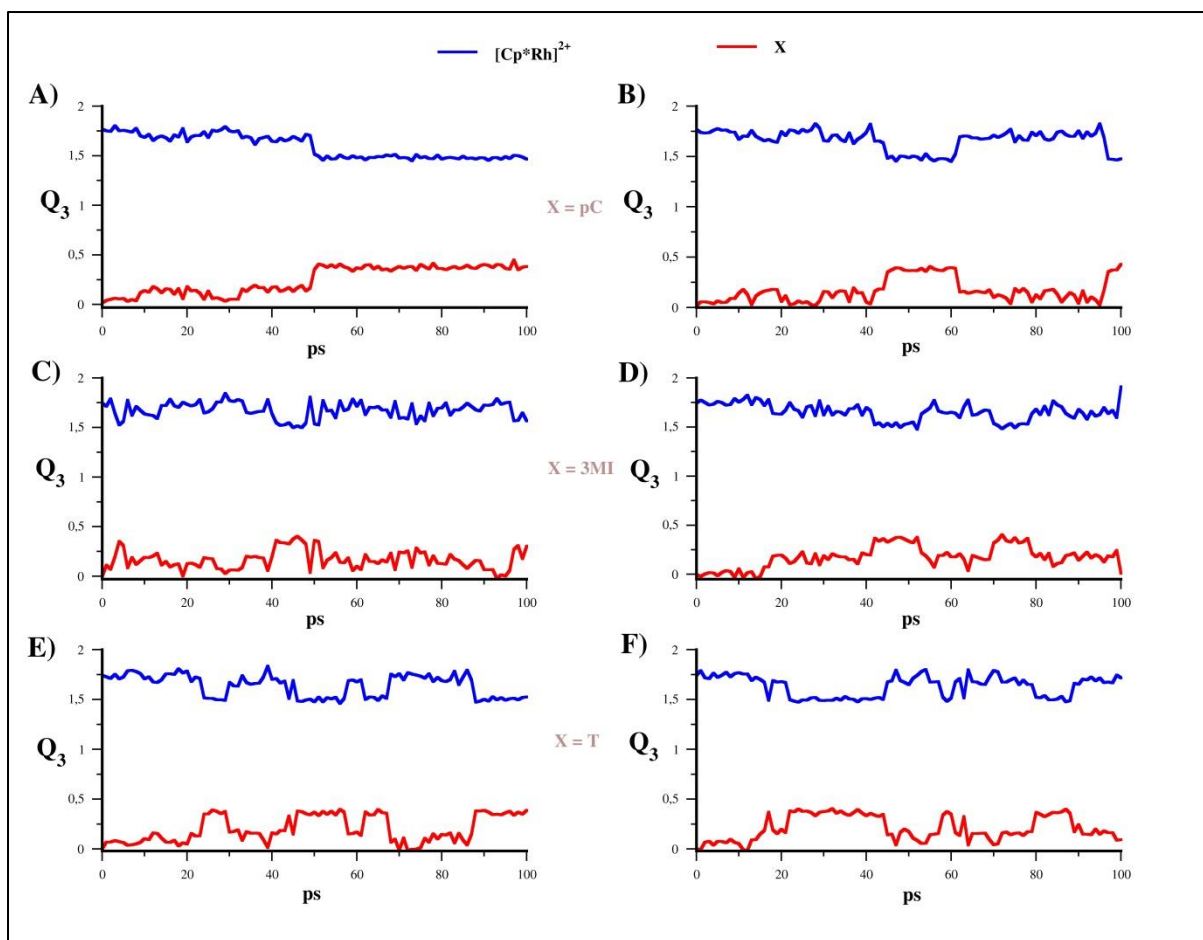

**Fig. S4**  $Q_3$  values of X and  $[Cp^*Rh]^{2+}$  (red and blue line, respectively) computed for sampled structures of MTD(RMSD) run 1 and 2 for **EC1** (a and b), **EC2** (c and d) and **EC3** (e and f)

**Table S3**  $E^{INT}$  values computed for **pC**, **3MI** and **T** in **EC1**, **EC2** and **EC3** structures optimized at B3LYP/6-311+G(d,p)// $\omega$ B97X-D/6-311+G(d,p) level of theory. All energy values are in kcal/mol

| Structure  | $E^{INT}$ |
|------------|-----------|
| <i>pC</i>  | -17.5     |
| <i>3MI</i> | -14.4     |
| <i>T</i>   | -10.3     |

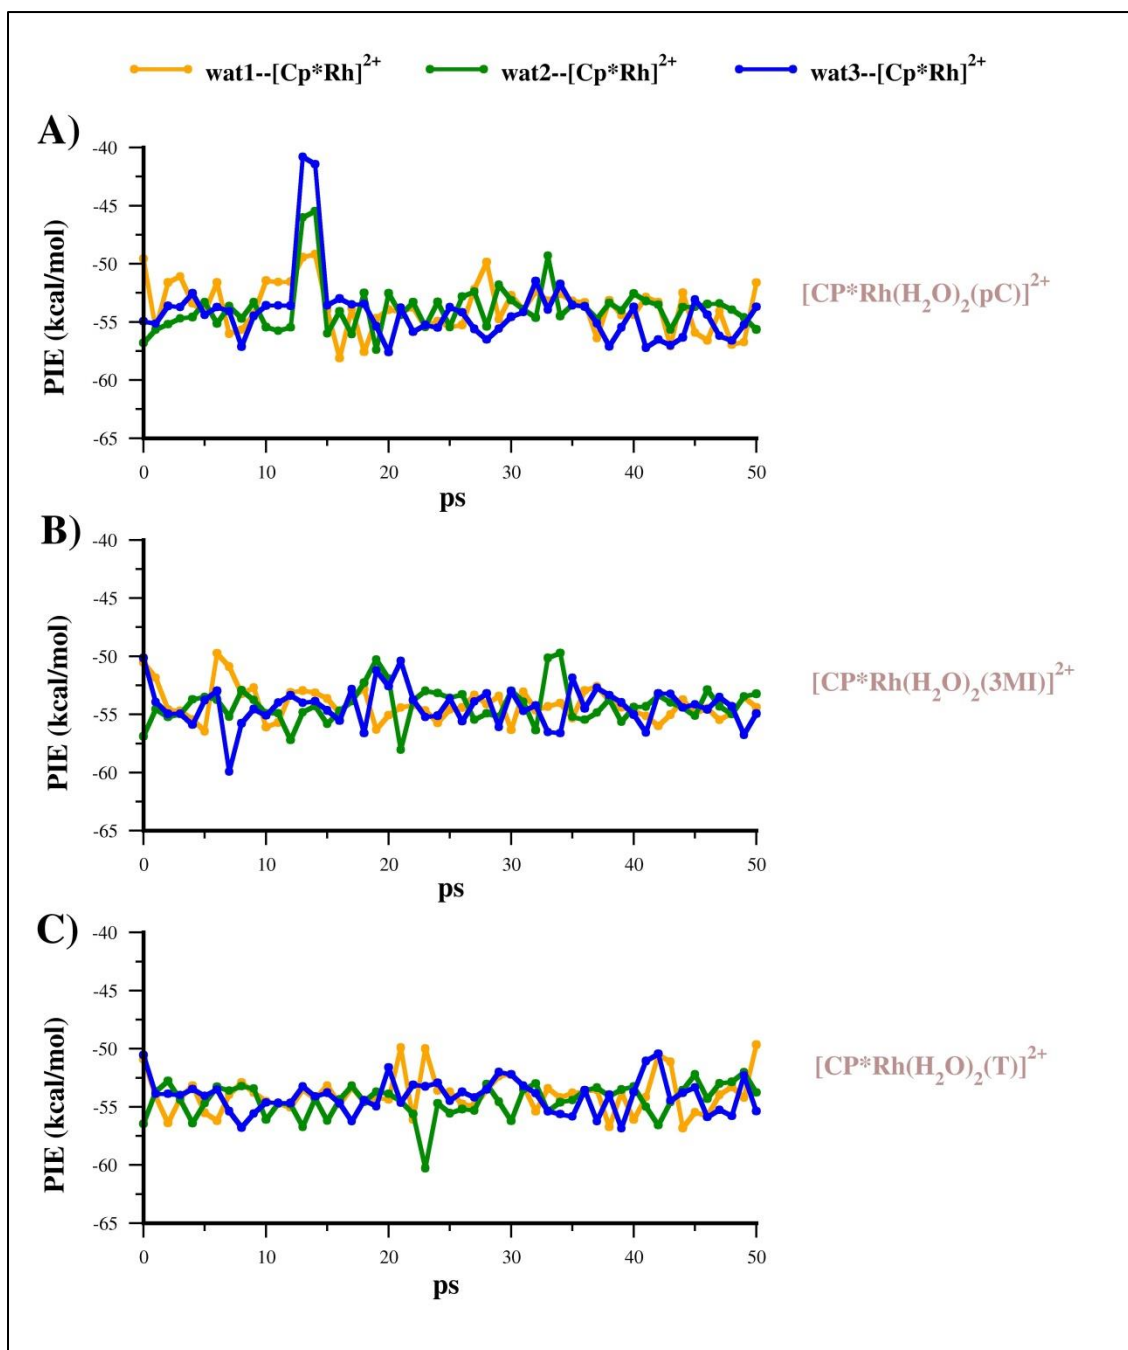

**Fig. S5** PIEs values of  $wat1--[CP^*Rh]^{2+}$  (yellow line),  $wat2--[CP^*Rh]^{2+}$  (green line) and  $wat3--[CP^*Rh]^{2+}$  (blue line) interactions computed for the sampled structures of MD simulations of A) **EC1**, B) **EC2** and C) **EC3**

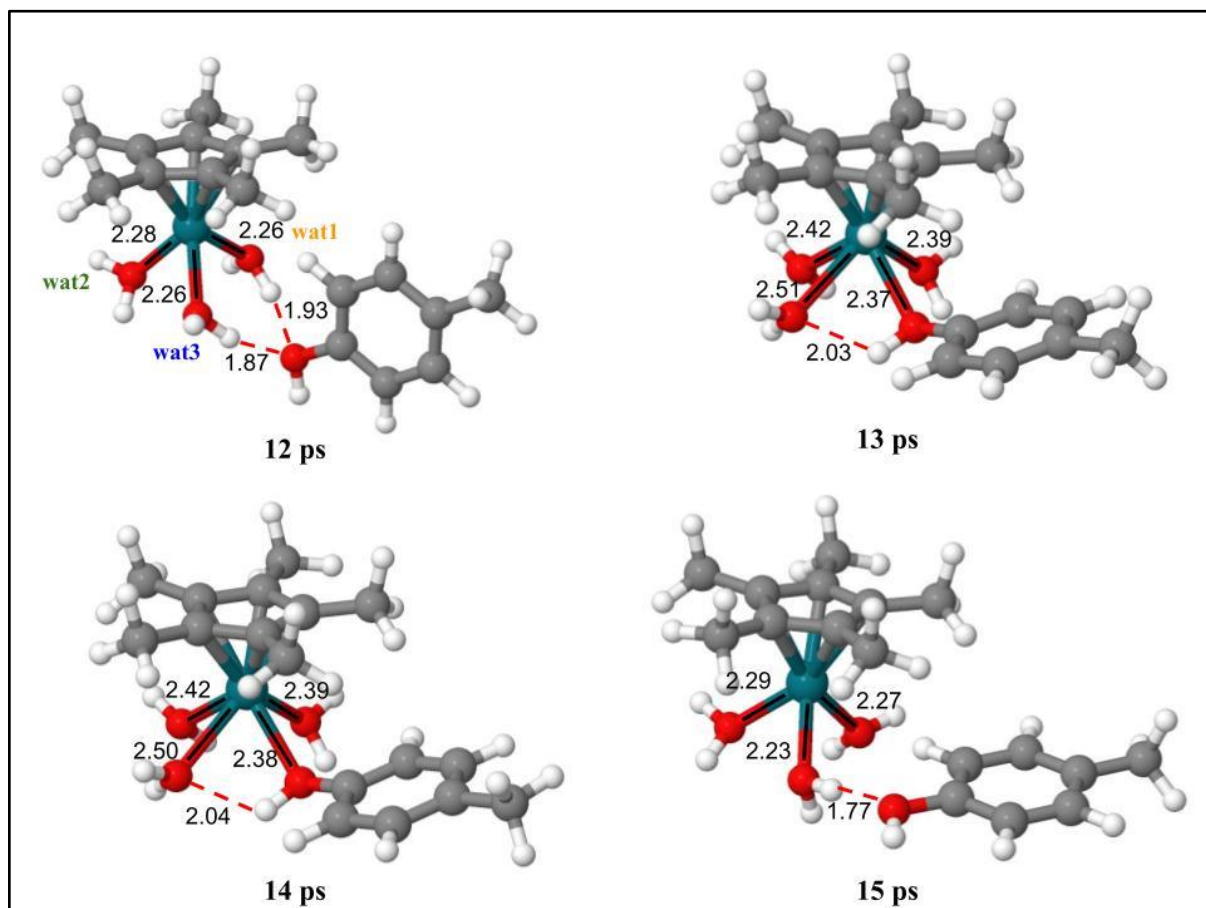

**Fig. S6** EC1 structures of MD simulations sampled at 12, 13, 14 and 15 ps. Hydrogen bonds and Rh-O coordinate bonds are reported in red dashed lines and in black lines, respectively
